# Supplementary material
Source: PubMed Central journal article supplement (PMC11558421)
Supplement: ajtr0016-5296-f10.pdf [file ajtr0016-5296-f10.pdf]

## Nomogram score for predicting outcomes in HICH

**Supplementary Table 1.** Basic information of the GSE24265 and GSE125512 from GEO

| GEO       | Organism     | Submission date | Platforms | Samples | Control | HICH | Experiment type            |
|-----------|--------------|-----------------|-----------|---------|---------|------|----------------------------|
| GSE24265  | Homo sapiens | Sep 24, 2010    | GPL570    | 11      | 7       | 4    | Array                      |
| GSE125512 | Homo sapiens | Jan 23, 2019    | GPL15433  | 22      | 11      | 11   | High throughput sequencing |

Note: GEO, Gene Expression Omnibus; HICH, Hypertensive intracerebral hemorrhage.

**Supplementary Table 2.** Primer sequences

| Gene name | Primer name | Primer Sequence (5'-3')  |
|-----------|-------------|--------------------------|
| PPBP      | Forward     | TCAGACCTACATCGTCCTGC     |
|           | Reverse     | GCGCAACAAGGATCAGGC       |
| PDLIM1    | Forward     | CTAGTGACCGAGGAGGGGAA     |
|           | Reverse     | CGGTAGGGCTGTTGTA CTGG    |
| TIMP1     | Forward     | AGCGCCCAGAGAGACACC       |
|           | Reverse     | CCACTCCGGGCAGGATT        |
| GAPDH     | Forward     | CGGAGTCAACGGATTTGGTCGTAT |
|           | Reverse     | AGCCTTCTCCATGGTGGTGAAGAC |

Note: PPBP, Pro-platelet basic protein; PDLIM1, PDZ and LIM domain protein 1; TIMP1, Metalloproteinase 1; GAPDH, Glyceraldehyde-3-phosphate dehydrogenase.
